# Supplementary material for: Influence of Phosphate Dissolving Micro-Organisms on Yield and Phosphate Uptake by Crops
Source: MDPI journal article supplement (doi:10.3390/medicina58040534), 2013-01-01
Supplement: s1 [file s1]

Supplementary Table S1: The result of logistic regression analysis for inverse probability of treatment weighting models

|                                                          | OR   | 95% CI       | <i>p</i> |
|----------------------------------------------------------|------|--------------|----------|
| Age, year                                                | 1.01 | 0.99 – 1.04  | 0.3856   |
| Sex, male                                                | 0.49 | 0.26 – 0.93  | 0.0301   |
| ASA class $\geq 3$                                       | 1.48 | 0.84 – 2.60  | 0.1729   |
| HBsAg positive                                           | 0.89 | 0.47 – 1.69  | 0.7126   |
| Anti-HCV Ab positive                                     | 0.69 | 0.32 – 1.50  | 0.3510   |
| Alcoholism                                               | 1.54 | 0.58 – 4.13  | 0.3883   |
| Liver cirrhosis                                          | 1.31 | 0.72 – 2.38  | 0.3759   |
| Child-Pugh class B                                       | 1.40 | 0.34 – 5.74  | 0.6366   |
| Clinically significant portal hypertension               | 0.24 | 0.07 – 0.84  | 0.0249   |
| Oesophageal varices                                      | 2.48 | 0.89 – 6.93  | 0.0840   |
| Diabetes mellitus                                        | 2.96 | 1.72 – 5.08  | 0.0001   |
| Chronic kidney disease                                   | 0.74 | 0.28 – 1.91  | 0.5308   |
| Haemoglobin, $\text{g}\cdot\text{dL}^{-1}$               | 1.02 | 0.87 – 1.20  | 0.7873   |
| Platelet count, $10^3\cdot\mu\text{L}^{-1}$              | 1.00 | 1.00 – 1.00  | 0.3015   |
| Thrombocytopenia                                         | 0.58 | 0.27 – 1.27  | 0.1737   |
| International normalized ratio                           | 1.06 | 0.04 – 29.37 | 0.9734   |
| Total bilirubin $\geq 1.0 \text{ mg}\cdot\text{dL}^{-1}$ | 1.22 | 0.66 – 2.27  | 0.5244   |
| AST $> 40 \text{ IU}\cdot\text{L}^{-1}$                  | 1.14 | 0.58 – 2.23  | 0.7047   |
| ALT $> 40 \text{ IU}\cdot\text{L}^{-1}$                  | 1.06 | 0.56 – 2.01  | 0.8502   |
| Alpha-fetoprotein $> 20 \text{ ng}\cdot\text{mL}^{-1}$   | 1.00 | 0.56 – 1.79  | 0.9924   |
| Albumin $\leq 3.5 \text{ g}\cdot\text{dL}^{-1}$          | 1.60 | 0.73 – 3.53  | 0.2396   |
| Serum creatinine, $\text{mg}\cdot\text{dL}^{-1}$         | 0.88 | 0.59 – 1.32  | 0.5434   |
| BCLC stage                                               |      |              | 0.3121   |
| Stage A vs. 0                                            | 1.56 | 0.50 – 4.86  | 0.4453   |
| Stage B vs. 0                                            | 2.99 | 0.68 – 13.05 | 0.1463   |
| Tumour diameter $> 5 \text{ cm}$                         | 0.35 | 0.13 – 0.96  | 0.0412   |
| Multifocal cancer                                        | 1.79 | 0.92 – 3.49  | 0.0858   |
| Poor or undifferentiated histology                       | 0.58 | 0.21 – 1.59  | 0.2885   |
| Microvascular invasion                                   | 0.72 | 0.36 – 1.42  | 0.3367   |
| Extracapsular invasion                                   | 0.90 | 0.49 – 1.62  | 0.7166   |
| Positive surgical margin                                 | 1.32 | 0.51 – 3.40  | 0.5703   |
| Preoperative TACE/RFA/PEI                                | 0.59 | 0.23 – 1.56  | 0.2921   |
| Hepatectomy $> 2$ segments                               | 1.33 | 0.75 – 2.38  | 0.3320   |
| Laparoscopic or robotic surgery                          | 0.55 | 0.15 – 1.95  | 0.3532   |
| Epidural blockade                                        | 0.92 | 0.50 – 1.67  | 0.7740   |
| Intraoperative blood loss, $\text{mL}^{\dagger}$         | 1.43 | 1.10 – 1.86  | 0.0075   |
| Blood transfusion rate                                   | 1.66 | 0.75 – 3.70  | 0.2120   |
| Anaesthesia duration, $\text{min}^{\dagger}$             | 2.58 | 1.26 – 5.26  | 0.0092   |
| Operation period (2011-2016 vs. 2005-2010)               | 1.50 | 0.76 – 2.94  | 0.2416   |

ALT: alanine aminotransferase; Anti-HCV Ab: hepatitis C antibody; ASA: American Society of Anesthesiologists; AST: aspartate aminotransferase; CI: confidence interval; BCLC: Barcelona Clinic Liver Cancer; HBsAg: hepatitis B surface antigen; HCC: hepatocellular carcinoma; OR: odds ratio; PEI: percutaneous ethanol injection; RFA: radiofrequency ablation; TACE: transarterial chemoembolization.  $\dagger$  On base-2 logarithmic scale
